# Supplementary material for: Identification of GNG7 as a novel biomarker and potential therapeutic target for gastric cancer via bioinformatic analysis and in vitro experiments
Source: publisher site journal article supplement (doi:10.18632/aging.204545), 2023-02-24
Supplement: Supplementary file [file aging-v15i5-204545-supplementary-material-SD1.pdf]

SUPPLEMENTARY FIGURES

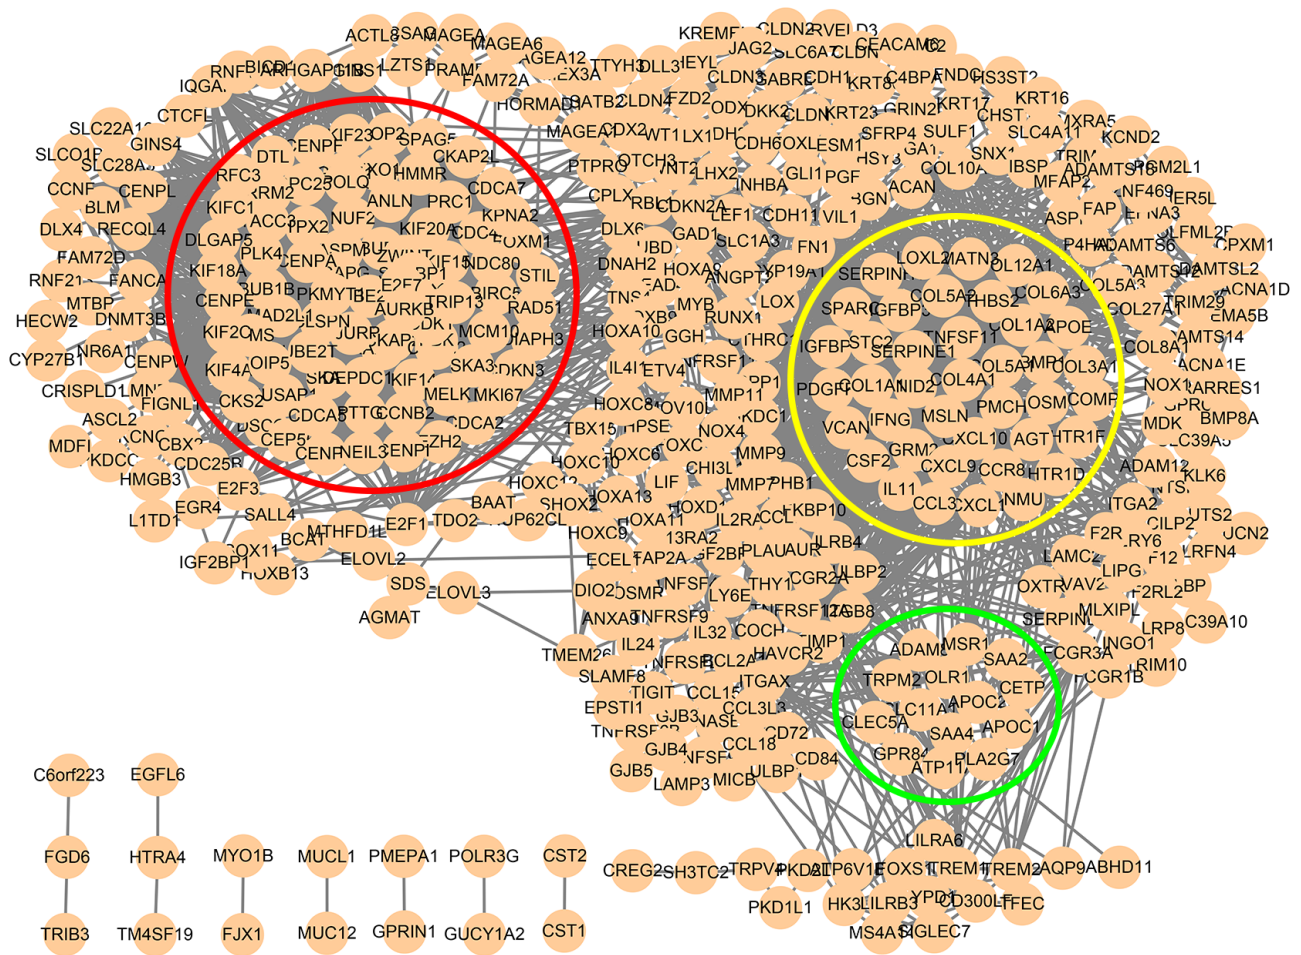

Supplementary Figure 1. PPI network of the 505 upregulated intersecting differentially expressed genes (DEGs). The red, yellow, and green circles represent the top three modules, respectively. DEGs, differentially expressed genes; PPI, protein–protein interaction.

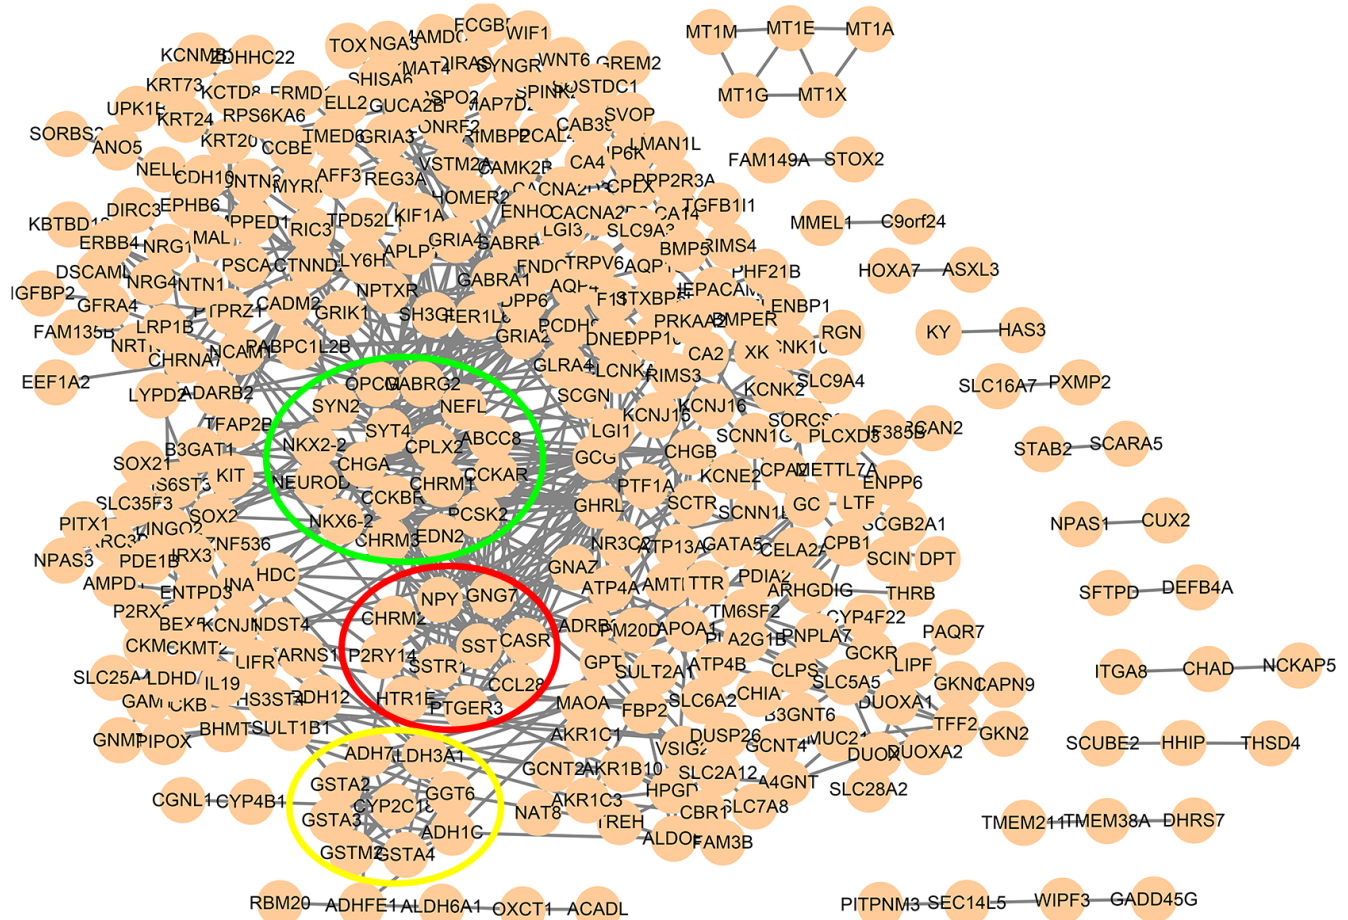

**Supplementary Figure 2. PPI network of the 392 downregulated intersecting differentially expressed genes (DEGs).** The red, yellow, and green circles represent the top three modules, respectively. DEGs, differentially expressed genes; PPI, protein-protein interaction.

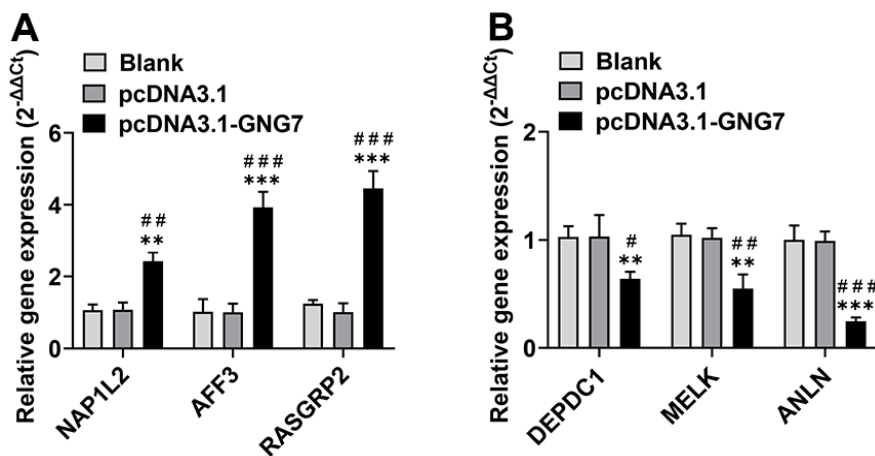

**Supplementary Figure 3. Overexpression of GNG7 regulated the expression of its coexpression genes in GC.** Expression levels of the top three positively (A) or negatively (B) correlated genes in control and GNG7-overexpressing SGC7901 cells determined by qRT-PCR. GC, gastric cancer; qRT-PCR, RNA extraction and quantitative reverse transcription-polymerase chain reaction. \*\* $P < 0.01$  and \*\*\* $P < 0.001$  versus control or blank group; # $P < 0.05$ , ### $P < 0.01$  and #### $P < 0.001$  versus pcDNA3.1 group.
